# Supplementary material
Source: Springer Nature journal article supplement (https://www.springermedizin.de/resource/supplementary/12911_2013_890_MOESM2_ESM.pdf/9526792)

**Missed Links  
%**

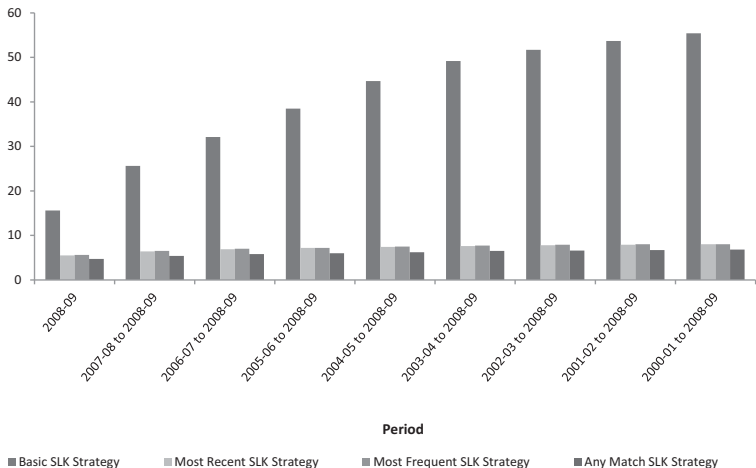

Supplement: MOESM2 [file 9526792]
